# Supplementary material for: Semi-hydrogenation of α,β-unsaturated aldehydes over sandwich-structured nanocatalysts prepared by phase transformation of thin-film Al2O3 to Al-TCPP
Source: Royal Society of Chemistry journal article supplement (doi:10.1039/d2nr04474a), 2022-01-01
Supplement: d2nr04474a1.pdf [file d2nr04474a1.pdf]

## ***Electronic Supplementary Information (ESI)***

---

### **Semi-hydrogenation of $\alpha,\beta$ -unsaturated aldehydes over sandwich-structured nanocatalysts prepared by phase-transformation of thin-film $\text{Al}_2\text{O}_3$ to Al-TCPP**

*Bin Chen,<sup>a,b</sup> Xin Yang,<sup>a,\*</sup> Yinan Xu,<sup>c</sup> Siyuan Hu,<sup>a</sup> Xiaoli Zeng,<sup>a</sup> Yiping Liu,<sup>a</sup> Kok Bing Tan,<sup>b</sup> Jiale Huang,<sup>b,\*</sup> and Guowu Zhan<sup>a,\*</sup>*

*<sup>a</sup> College of Chemical Engineering, Integrated Nanocatalysts Institute (INCI), Huaqiao University, 668 Jimei Blvd., Xiamen, Fujian, 361021, P. R. China*

*<sup>b</sup> Department of Chemical and Biochemical Engineering, College of Chemistry and Chemical Engineering, Xiamen University, 422 Siming South Road, Xiamen, Fujian 361005, P. R. China*

*<sup>c</sup> Davidson School of Chemical Engineering, Purdue University, 480 Stadium Mall Drive, West Lafayette, IN 47907, USA*

*\*Corresponding Authors E-mail: [gwzhan@hqu.edu.cn](mailto:gwzhan@hqu.edu.cn) (G. Zhan), [yangxin@hqu.edu.cn](mailto:yangxin@hqu.edu.cn) (X. Yang), and [cola@xmu.edu.cn](mailto:cola@xmu.edu.cn) (J. Huang)*

## Table of Contents

### Supporting Tables

|                                                                                                              |   |
|--------------------------------------------------------------------------------------------------------------|---|
| <b>Table S1.</b> ICP analysis results of different catalyst samples. ....                                    | 4 |
| <b>Table S2.</b> Textural properties of different catalyst samples. ....                                     | 5 |
| <b>Table S3.</b> The comparisons of different catalyst performances for selective hydrogenation of CAL. .... | 6 |
| <b>Table S4.</b> The amount of CO molecules adsorbed on the catalysts measured by CO pulsed adsorption. .... | 8 |

### Supporting Scheme

|                                                                                                                                                                       |   |
|-----------------------------------------------------------------------------------------------------------------------------------------------------------------------|---|
| <b>Scheme S1.</b> (a) The traditional synthetic route of MOFs@MNPs@MOFs materials, and (b) the novel synthetic strategy of MOFs@MNPs@MOFs proposed in this work. .... | 9 |
|-----------------------------------------------------------------------------------------------------------------------------------------------------------------------|---|

### Supporting Figures

|                                                                                                                                                                                                                                                                                                                                                          |    |
|----------------------------------------------------------------------------------------------------------------------------------------------------------------------------------------------------------------------------------------------------------------------------------------------------------------------------------------------------------|----|
| <b>Figure S1.</b> (a) TEM image at low magnification of MIL-88B(Fe)@Pt@Al-TCPP catalyst. (b) Particle size distribution histogram of Pt NPs on MIL-88B(Fe)@Pt@Al-TCPP. ....                                                                                                                                                                              | 10 |
| <b>Figure S2.</b> Powder XRD pattern of the pure Al-TCPP. ....                                                                                                                                                                                                                                                                                           | 11 |
| <b>Figure S3.</b> Solid-state UV-vis spectra of MIL-88B(Fe)@Pt@Al <sub>2</sub> O <sub>3</sub> and MIL-88B(Fe)@Pt@Al-TCPP samples. ....                                                                                                                                                                                                                   | 12 |
| <b>Figure S4.</b> TGA curve of MIL-88B(Fe) under air atmosphere. ....                                                                                                                                                                                                                                                                                    | 13 |
| <b>Figure S5.</b> Molecular structure of cinnamaldehyde (CAL, 1.05 × 0.65 nm). Color code: carbon-gray, oxygen-red, and hydrogen-blue. ....                                                                                                                                                                                                              | 14 |
| <b>Figure S6.</b> FTIR spectra of different samples: CAL molecule, MIL-88B(Fe), and MIL-88B(Fe)/CAL mixture. ....                                                                                                                                                                                                                                        | 15 |
| <b>Figure S7.</b> FTIR spectra of different samples: CAL molecule, Al-TCPP, and Al-TCPP/CAL mixture. ....                                                                                                                                                                                                                                                | 16 |
| <b>Figure S8.</b> Digital photos show contact angles of a water droplet on different substrates such as (a) MIL-88B(Fe) and (b) MIL-88B(Fe)@Pt@Al <sub>2</sub> O <sub>3</sub> catalysts. The catalytic conversion and selectivity of MIL-88B(Fe)@Pt and MIL-88B(Fe)@Pt@Al <sub>2</sub> O <sub>3</sub> catalysts for selective hydrogenation of CAL. .... | 17 |
| <b>Figure S9.</b> FTIR spectra of pure CAL molecule, MIL-88B(Fe)@Pt@Al-TCPP, and CAL adsorbed on MIL-88B(Fe)@Pt@Al-TCPP. ....                                                                                                                                                                                                                            | 18 |
| <b>Figure S10.</b> FTIR spectra of MIL-88B(Fe)@Pt@Al-TCPP produced by using ALD Al <sub>2</sub> O <sub>3</sub> with different layer thicknesses. ....                                                                                                                                                                                                    | 19 |
| <b>Figure S11.</b> (a-d) Representative SEM images of MIL-88B(Fe)@Pt@Al-TCPP catalysts produced by using ALD Al <sub>2</sub> O <sub>3</sub> with different layer thicknesses. ....                                                                                                                                                                       | 20 |

|                                                                                                                                                                                                                              |    |
|------------------------------------------------------------------------------------------------------------------------------------------------------------------------------------------------------------------------------|----|
| <b>Figure S12.</b> XRD patterns of MIL-88B(Fe)@Pt@Al-TCPP produced by using ALD Al <sub>2</sub> O <sub>3</sub> with different layer thicknesses. ....                                                                        | 21 |
| <b>Figure S13.</b> (a-b) The conversion and selectivity data during the recycling experiments using MIL-88B(Fe)@Pt@Al-TCPP catalyst. (c-d) XRD pattern and SEM image of MIL-88B(Fe)@Pt@Al-TCPP catalyst after 5 cycles. .... | 22 |
| <b>Figure S14.</b> (a) N <sub>2</sub> physisorption isotherms at 77 K and (b) pore-size distribution curve of MIL-88B(Fe)@Pt@Al-TCPP after 5 cycles. ....                                                                    | 23 |
| <b>Figure S15.</b> The conversion and selectivity data of furfural (FA) selective hydrogenation using MIL-88B(Fe)@Pt@Al-TCPP catalyst. ....                                                                                  | 24 |
| <b>Figure S16.</b> High-resolution O 1s spectra of MIL-88B(Fe), MIL-88B(Fe)@Pt, MIL-88B(Fe)@Pt@Al <sub>2</sub> O <sub>3</sub> , and MIL-88B(Fe)@Pt@Al-TCPP catalysts. ....                                                   | 25 |
| <b>Figure S17.</b> The bond length of the C=O double bond of (a) the free CAL molecule. The bond length of the C=O double bond of the CAL molecule adsorbed on (b) Pt NPs, (c) MIL-88B(Fe), and (d) Al-TCPP. ....            | 26 |
| <b>Figure S18.</b> The bond angle of the C=O double bond of (a) the free CAL molecule. The bond angle of the C=O double bond of the CAL molecule adsorbed on (b) Pt NPs, (c) MIL-88B(Fe), and (d) Al-TCPP. ....              | 27 |

**Table S1.** ICP analysis results of different catalyst samples.

| Catalyst                                      | Fe/wt% | Pt/wt% | Al/wt% |
|-----------------------------------------------|--------|--------|--------|
| MIL-88B(Fe)@Pt                                | 15.4   | 3.3    | nil    |
| MIL-88B(Fe)@Pt@Al <sub>2</sub> O <sub>3</sub> | 12     | 2.9    | 12.4   |
| MIL-88B(Fe)@Pt@Al-TCPP                        | 8.2    | 1.7    | 8.5    |

**Table S2.** Textural properties of different catalyst samples.

| Sample                                        | $S_{\text{BET}}$<br>( $\text{m}^2 \text{g}^{-1}$ ) | $S_{\text{meso}}$<br>( $\text{m}^2 \text{g}^{-1}$ ) | $V_{\text{t}}$<br>( $\text{cm}^3 \text{g}^{-1}$ ) | $V_{\text{meso}}$<br>( $\text{cm}^3 \text{g}^{-1}$ ) |
|-----------------------------------------------|----------------------------------------------------|-----------------------------------------------------|---------------------------------------------------|------------------------------------------------------|
| MIL-88B(Fe)                                   | 100.3                                              | 100.3                                               | 1.41                                              | 0                                                    |
| MIL-88B(Fe)@Pt                                | 45.4                                               | 45.3                                                | 0.25                                              | 0                                                    |
| MIL-88B(Fe)@Pt@Al <sub>2</sub> O <sub>3</sub> | 42.2                                               | 42.2                                                | 0.35                                              | 0                                                    |
| MIL-88B(Fe)@Pt@Al-TCPP                        | 472.2                                              | 243.2                                               | 1.30                                              | 0.097                                                |

Notes:  $S_{\text{BET}}$  is the BET-specific surface area,  $S_{\text{meso}}$  is the specific mesopore surface area estimated by subtracting  $S_{\text{micro}}$ , the t-plot-specific micropore surface area calculated from the N<sub>2</sub> adsorption-desorption isotherm from  $S_{\text{BET}}$ .  $V_{\text{t}}$  is the total specific pore volume determined by using the adsorption branch of the N<sub>2</sub> isotherm at  $P/P_0=0.99$ , and  $V_{\text{meso}}$  is the specific mesopore volume obtained from the BJH cumulative specific desorption volume.

**Table S3.** The comparisons of different catalyst performances for selective hydrogenation of CAL.

| Catalysts                                 | Temperature (°C) | P <sub>H2</sub> (bar) | Time (min) | Pt loading (%) | Conversion (%) | COL selectivity (%) | TOF <sub>Pt</sub> (h <sup>-1</sup> ) | References |
|-------------------------------------------|------------------|-----------------------|------------|----------------|----------------|---------------------|--------------------------------------|------------|
| Pt/SiO <sub>2</sub>                       | 150              | 10                    | 15         | 5.0            | 14.0           | 13.0                | 468                                  | [1]        |
| Pt <sub>0.1</sub> Au/SiO <sub>2</sub>     | 150              | 10                    | 15         | 10.0           | 16.0           | 21.0                | 11196                                | [2]        |
| Pt/SBA-15                                 | 90               | 20                    | 60         | 6.5            | 22.3           | 40.9                | 756                                  | [3]        |
| Pt/Al <sub>2</sub> O <sub>3</sub> @SBA-15 | 90               | 20                    | 60         | 5.3            | 34.9           | 64.7                | 972                                  | [3]        |
| Pt/TiH <sub>2</sub>                       | 100              | 40                    | 30         | 1.0            | 30.0           | 88.7                | 399                                  | [4]        |
| PtCo/CNTs                                 | 60               | 25                    | 90         | 0.5            | 92.4           | 93.6                | 500                                  | [5]        |
| Pt/MgAl-LDH                               | 60               | 10                    | 120        | 2.0            | 79.7           | 85.4                | 318                                  | [6]        |
| Pt@UiO-66-NH <sub>2</sub>                 | 25               | 40                    | 2640       | 1.0            | 85.9           | 87.9                | 23                                   | [7]        |
| MIL-101@Pt@FeP-CMP <sup>a</sup>           | 25               | 30                    | 15         | n.a.           | 97.9           | 82.7                | 1464                                 | [8]        |
| MIL-101(Fe)@Pt@MIL-101(Fe)                | 25               | 30                    | 1440       | 4.7            | 94.3           | 97                  | 13                                   | [9]        |
| Pt/Fe-LDH                                 | 110              | 10                    | 120        | 2.8            | 90.0           | 92.0                | 17.4                                 | [10]       |
| Pt/Fe <sub>3</sub> O <sub>4</sub>         | 30               | 50                    | 150        | 2.5            | 94.2           | 92.2                | 6                                    | [11]       |

|                                                                   |    |    |     |      |       |       |      |           |
|-------------------------------------------------------------------|----|----|-----|------|-------|-------|------|-----------|
| Pt <sub>30</sub> Fe <sub>30</sub> /Al <sub>2</sub> O <sub>3</sub> | 60 | 20 | 480 | 0.4  | 75.0% | 84.0% | n.a. | [12]      |
| Fe <sub>0.33</sub> Pt <sub>0.67</sub> -C10F <sup>b</sup>          | 50 | 1  | 60  | 0.62 | 71.1% | 94%   | n.a. | [13]      |
| Pt-FeO <sub>x</sub> /MoO <sub>3-y</sub>                           | 30 | 10 | 180 | 3.7  | 68.8% | 91.3% | n.a. | [14]      |
| MIL-88B (Fe)@Pt@Al-TCPP                                           | 60 | 30 | 240 | 1.7  | 95.0  | 85.0  | 48   | this work |
| MIL-88B (Fe)@Pt@Al <sub>2</sub> O <sub>3</sub>                    | 60 | 30 | 240 | 2.9  | 61.0  | 64.0  | 11   | this work |
| MIL-88B (Fe)@Pt                                                   | 60 | 30 | 240 | 3.3  | 35.0  | 64.0  | 5.5  | this work |

Notes: <sup>a</sup>FeP-CMPs is a conjugated micro- and mesoporous polymers with iron(III) porphyrin. <sup>b</sup>C10F is an F-containing carboxylate surface ligand with a carbon chain length of 10.

**Table S4.** The amount of CO molecules adsorbed on the catalysts measured by CO pulsed adsorption.

| Sample                                        | CO adsorption quantity<br>( $\mu\text{mol/g}$ ) | Pt dispersion |
|-----------------------------------------------|-------------------------------------------------|---------------|
| MIL-88B(Fe)                                   | 838.5                                           | -             |
| MIL-88B(Fe)@Pt                                | 883.6                                           | 0.266         |
| MIL-88B(Fe)@Al <sub>2</sub> O <sub>3</sub>    | 1473.0                                          | -             |
| MIL-88B(Fe)@Pt@Al <sub>2</sub> O <sub>3</sub> | 1601.3                                          | 0.8655        |
| MIL-88B(Fe)@Al-TCPP                           | 1573.0                                          | -             |
| MIL-88B(Fe)@Pt@Al-TCPP                        | 1960.0                                          | >0.95         |



**a** Traditional Synthesis Methods of MOFs@MNPs@MOFs

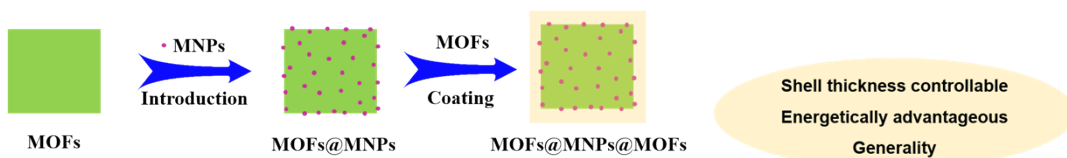

**b** New strategies for the synthesis of MOFs@MNPs@MOFs

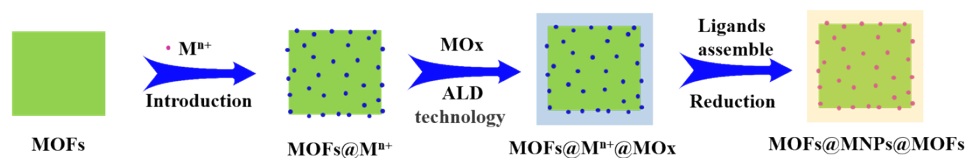

**Scheme S1.** (a) The traditional synthetic route of MOFs@MNPs@MOFs materials, and (b) the novel synthetic strategy of MOFs@MNPs@MOFs proposed in this work.

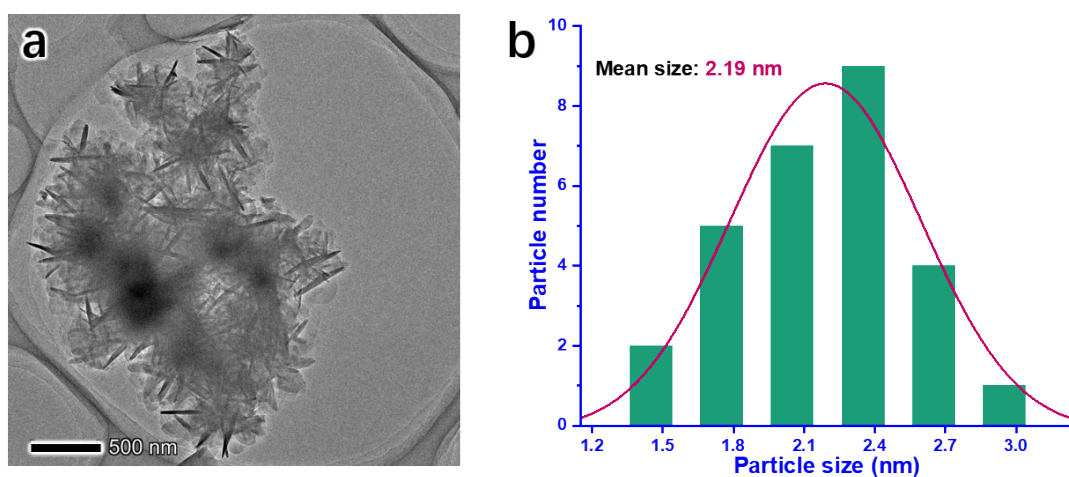

**Figure S1.** (a) TEM image at low magnification of MIL-88B(Fe)@Pt@Al-TCPP catalyst. (b) Particle size distribution histogram of Pt NPs on MIL-88B(Fe)@Pt@Al-TCPP.

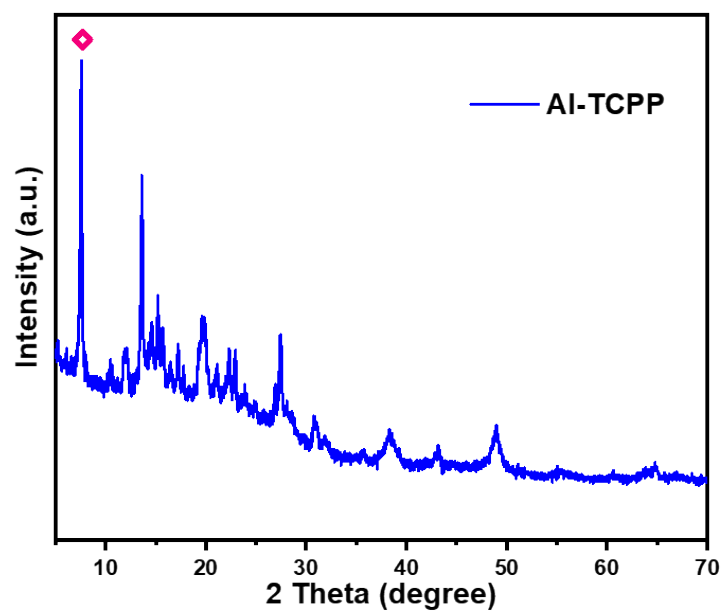

**Figure S2.** Powder XRD pattern of the pure Al-TCPP.

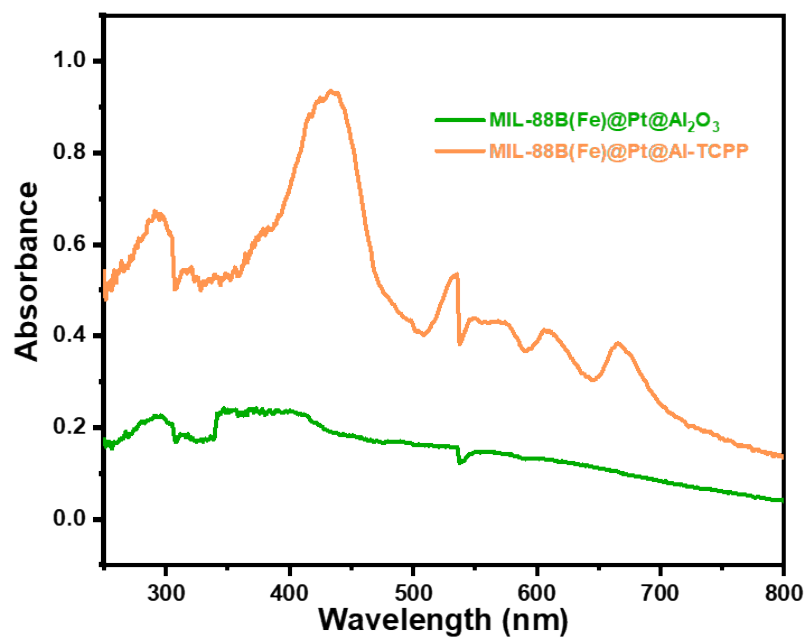

**Figure S3.** Solid-state UV-vis spectra of MIL-88B(Fe)@Pt@Al<sub>2</sub>O<sub>3</sub> and MIL-88B(Fe)@Pt@Al-TCPP samples.

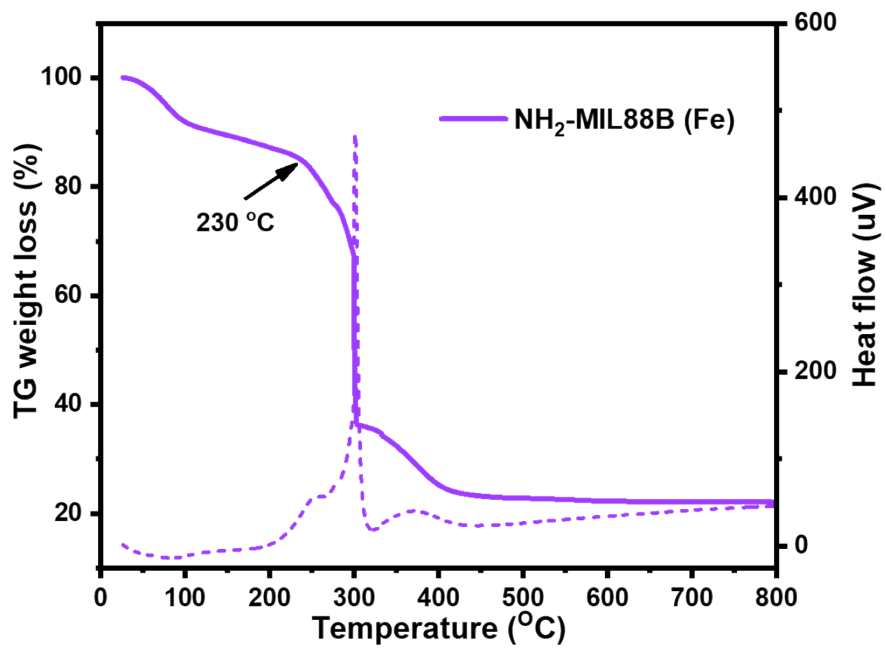

Figure S4. TGA curve of MIL-88B(Fe) under air atmosphere.

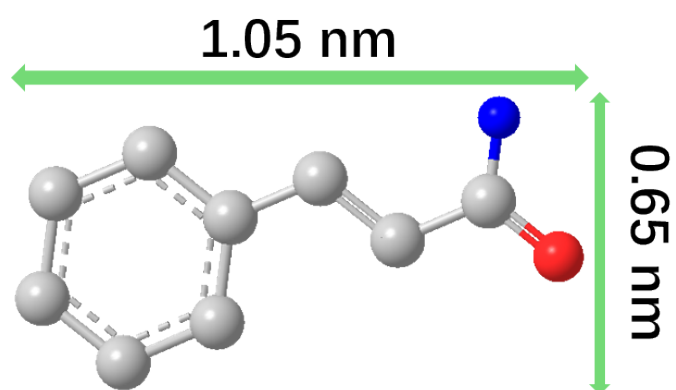

**Figure S5.** Molecular structure of cinnamaldehyde (CAL,  $1.05 \times 0.65$  nm). Color code: carbon-gray, oxygen-red, and hydrogen-blue.

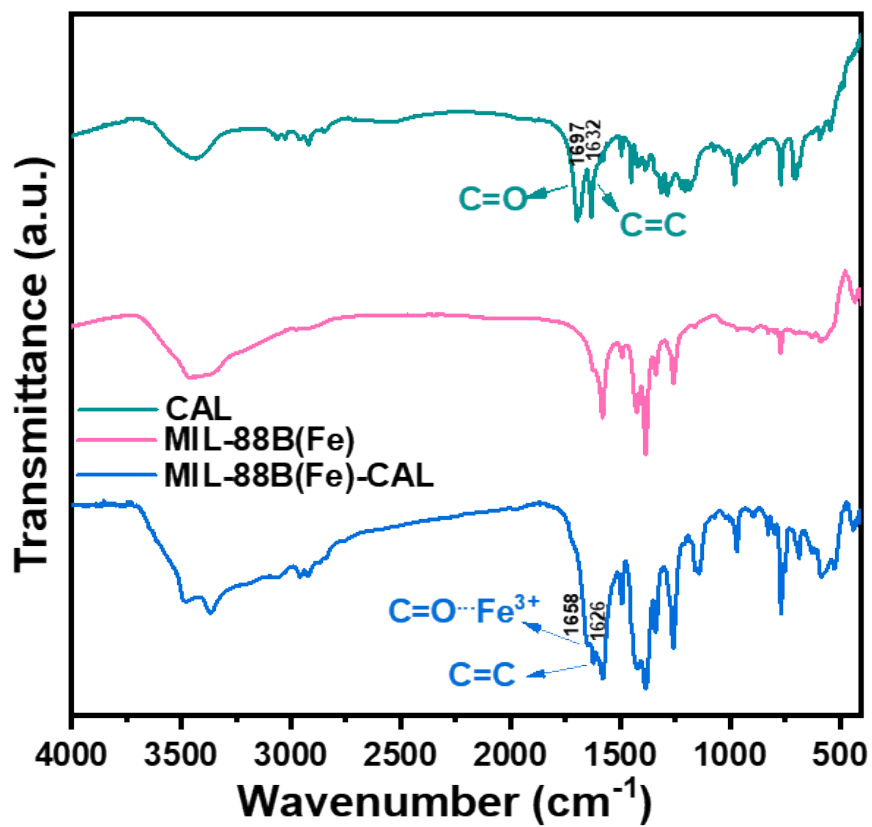

**Figure S6.** FTIR spectra of different samples: CAL molecule, MIL-88B(Fe), and MIL-88B(Fe)/CAL mixture.

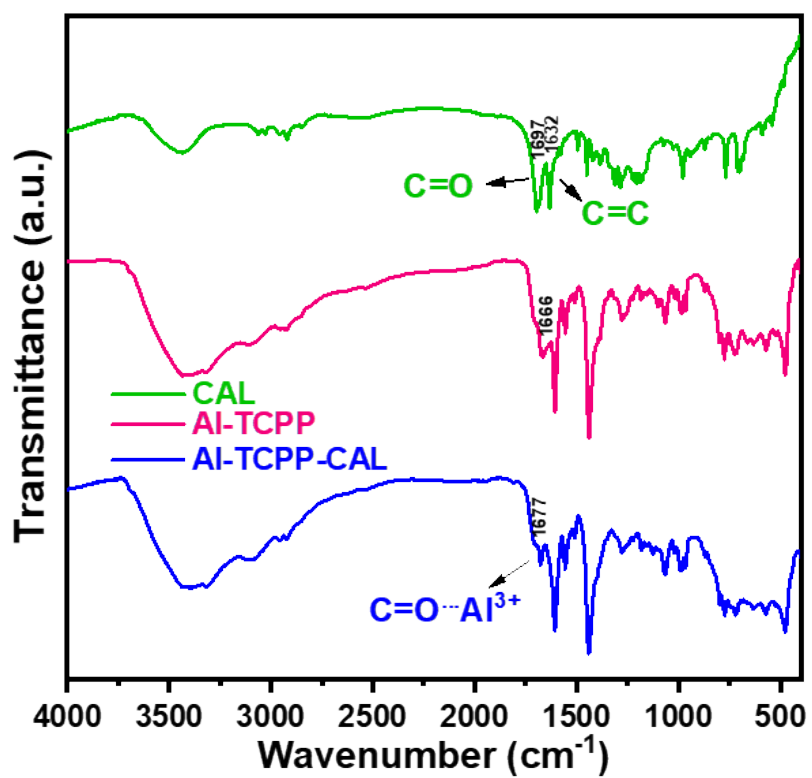

**Figure S7.** FTIR spectra of different samples: CAL molecule, Al-TCPP, and Al-TCPP/CAL mixture.



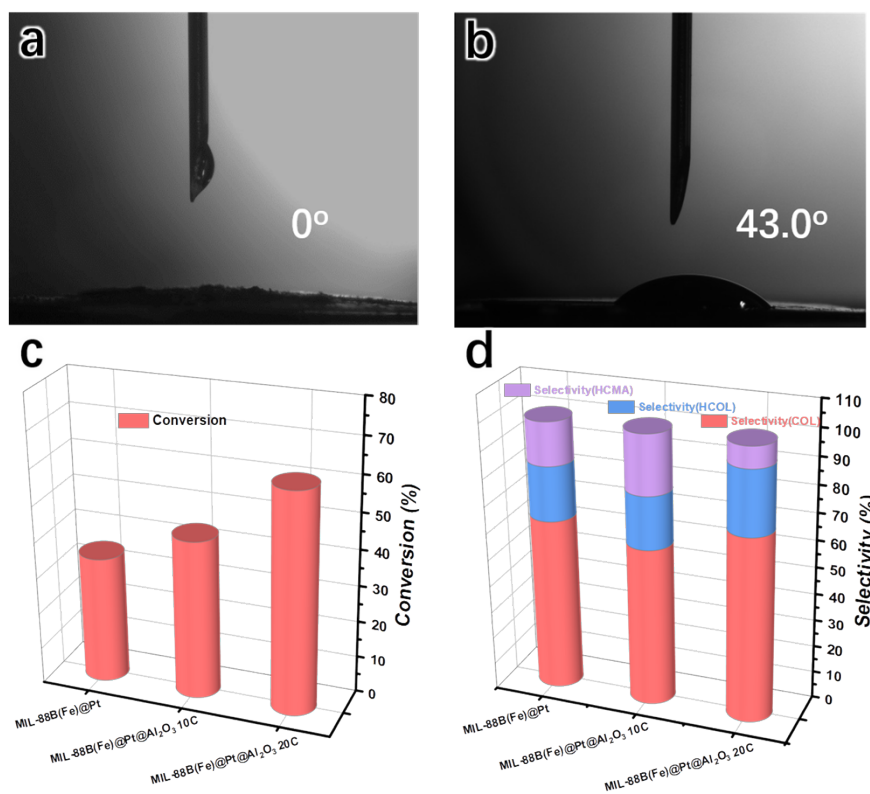

**Figure S8.** Digital photos show contact angles of a water droplet on different substrates such as (a) MIL-88B(Fe) and (b) MIL-88B(Fe)@Pt@Al<sub>2</sub>O<sub>3</sub> catalysts. The catalytic conversion and selectivity of MIL-88B(Fe)@Pt and MIL-88B(Fe)@Pt@Al<sub>2</sub>O<sub>3</sub> catalysts for selective hydrogenation of CAL.

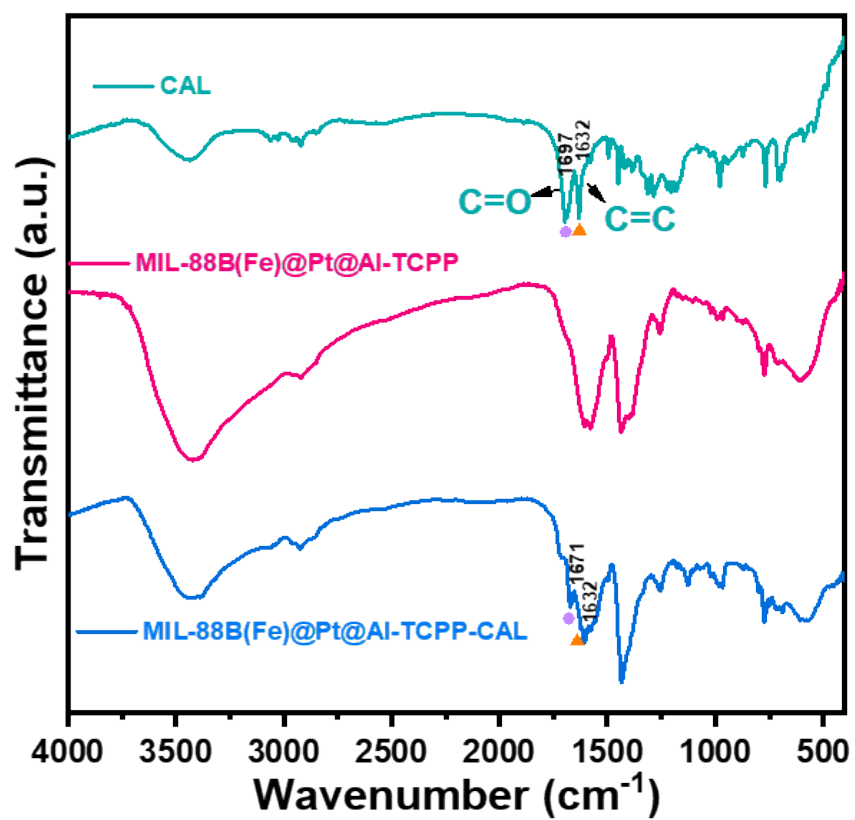

**Figure S9.** FTIR spectra of pure CAL molecule, MIL-88B(Fe)@Pt@Al-TCPP, and CAL adsorbed on MIL-88B(Fe)@Pt@Al-TCPP.

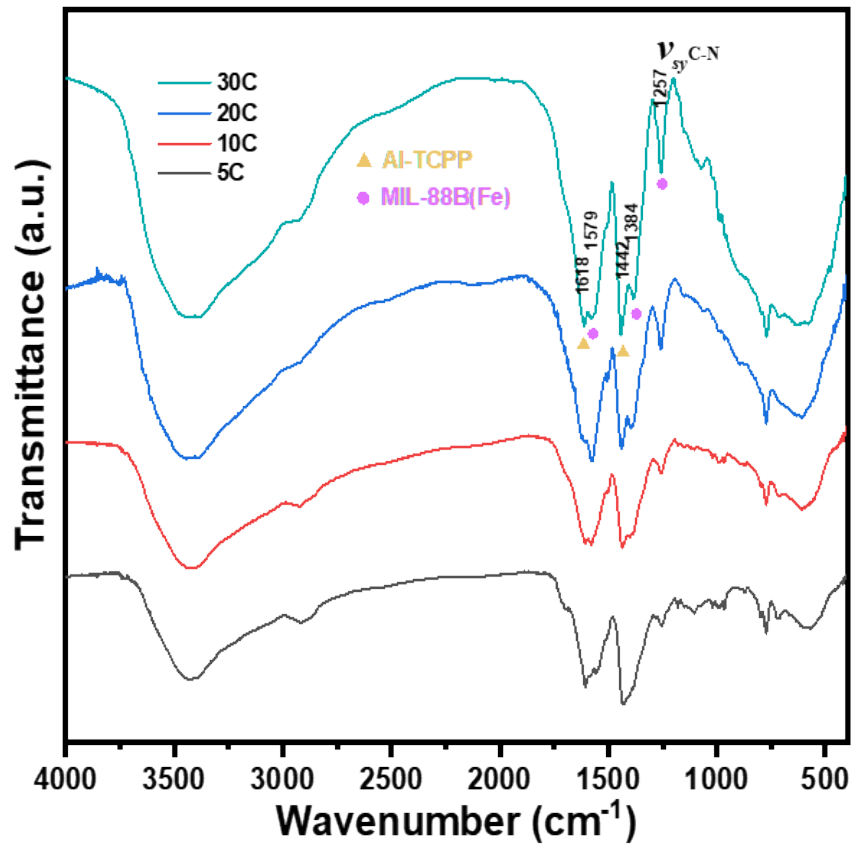

**Figure S10.** FTIR spectra of MIL-88B(Fe)@Pt@Al-TCPP produced by using ALD Al<sub>2</sub>O<sub>3</sub> with different layer thicknesses.

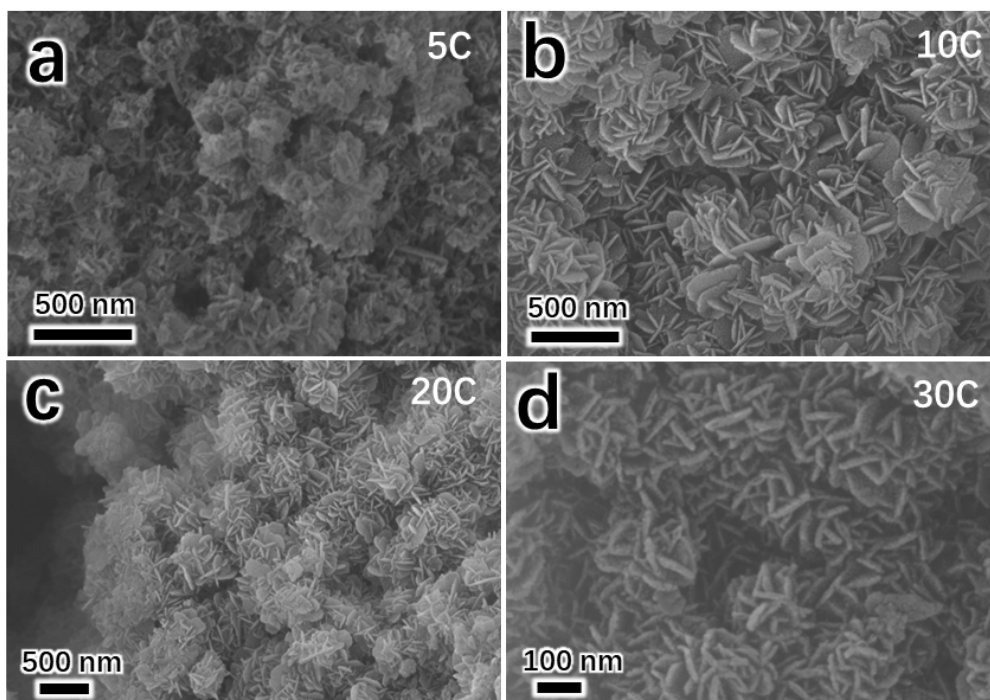

**Figure S11.** (a-d) Representative SEM images of MIL-88B(Fe)@Pt@Al-TCPP catalysts produced by using ALD Al<sub>2</sub>O<sub>3</sub> with different layer thicknesses.

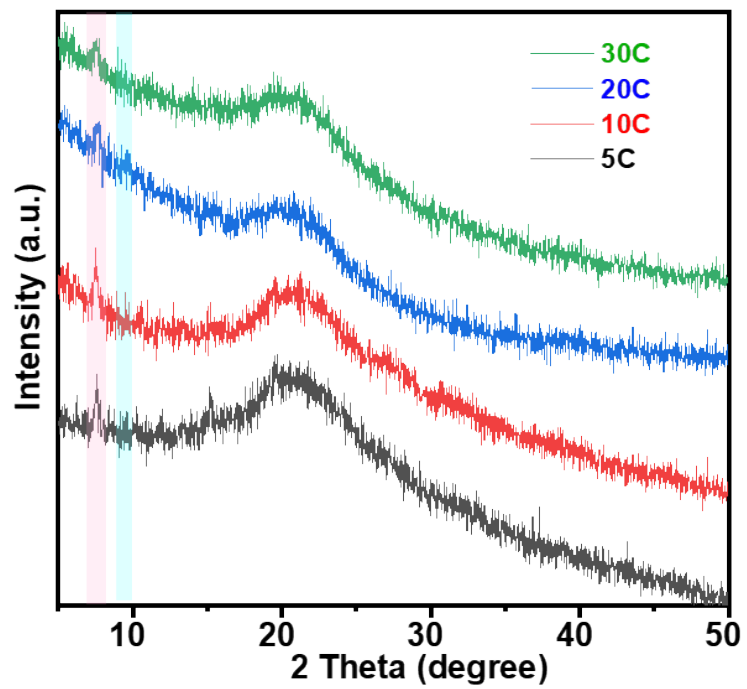

**Figure S12.** XRD patterns of MIL-88B(Fe)@Pt@Al-TCPP produced by using ALD Al<sub>2</sub>O<sub>3</sub> with different layer thicknesses.

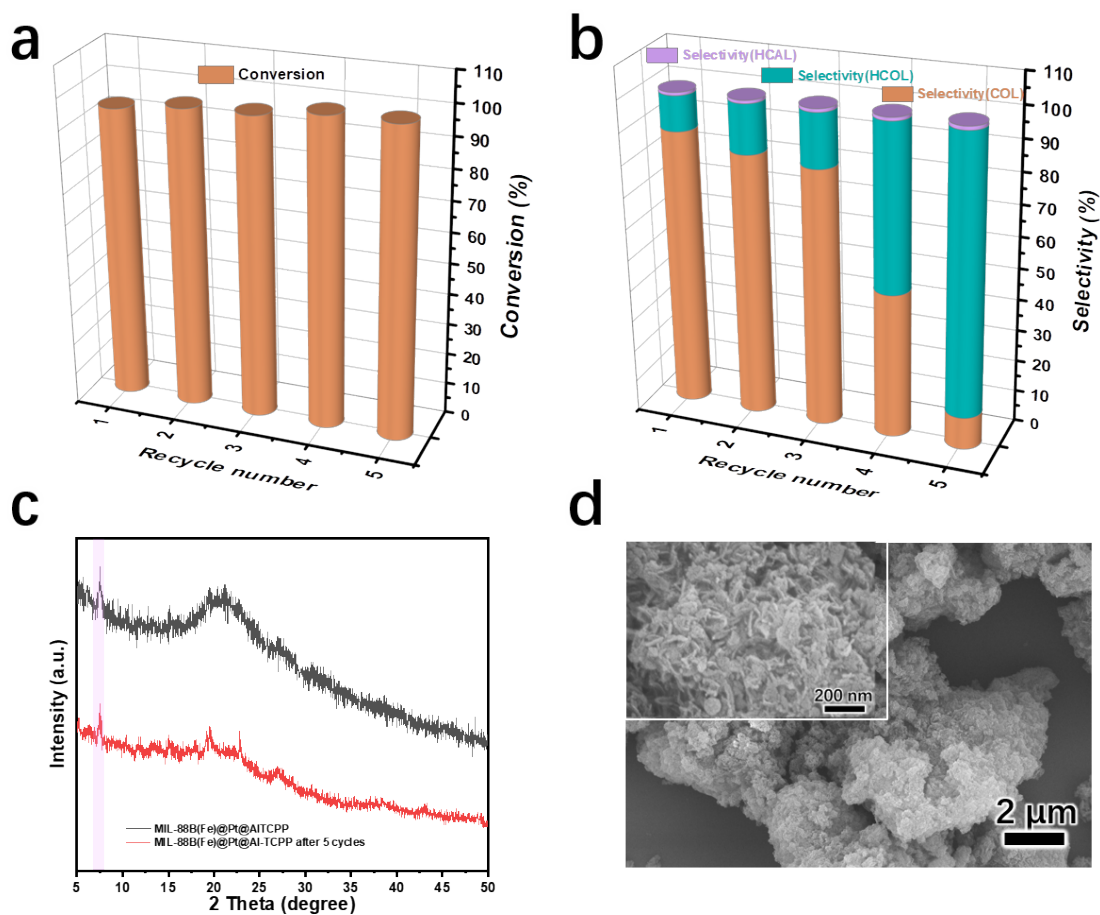

**Figure S13.** (a-b) The conversion and selectivity data during the recycling experiments using MIL-88B(Fe)@Pt@Al-TCPP catalyst. (c-d) XRD pattern and SEM image of MIL-88B(Fe)@Pt@Al-TCPP catalyst after 5 cycles.

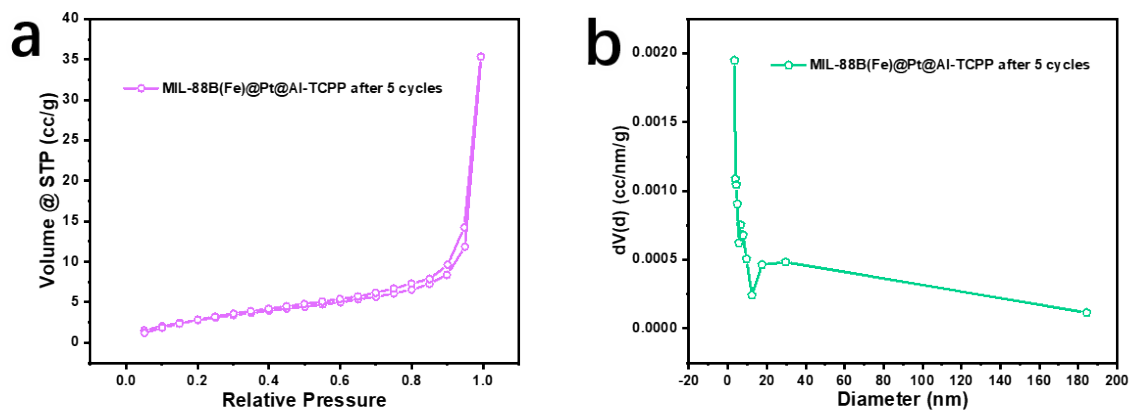

**Figure S14.** (a) N<sub>2</sub> physisorption isotherms at 77 K and (b) pore-size distribution curve of MIL-88B(Fe)@Pt@Al-TCPP after 5 cycles.

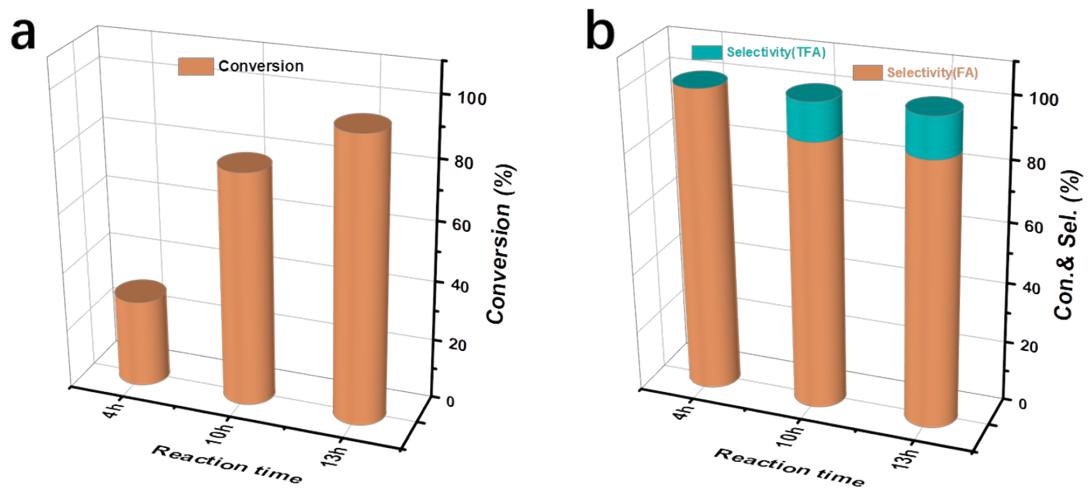

**Figure S15.** The conversion and selectivity data of furfural (FA) selective hydrogenation using MIL-88B(Fe)@Pt@Al-TCPP catalyst.



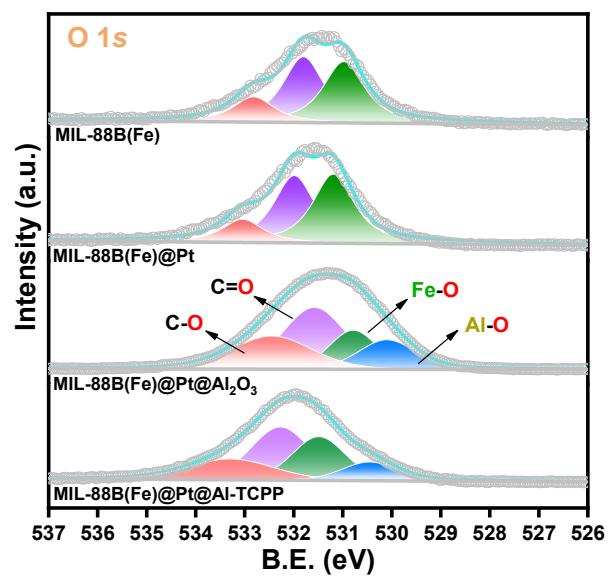

**Figure S16.** High-resolution O 1s spectra of MIL-88B(Fe), MIL-88B(Fe)@Pt, MIL-88B(Fe)@Pt@Al<sub>2</sub>O<sub>3</sub>, and MIL-88B(Fe)@Pt@Al-TCPP catalysts.

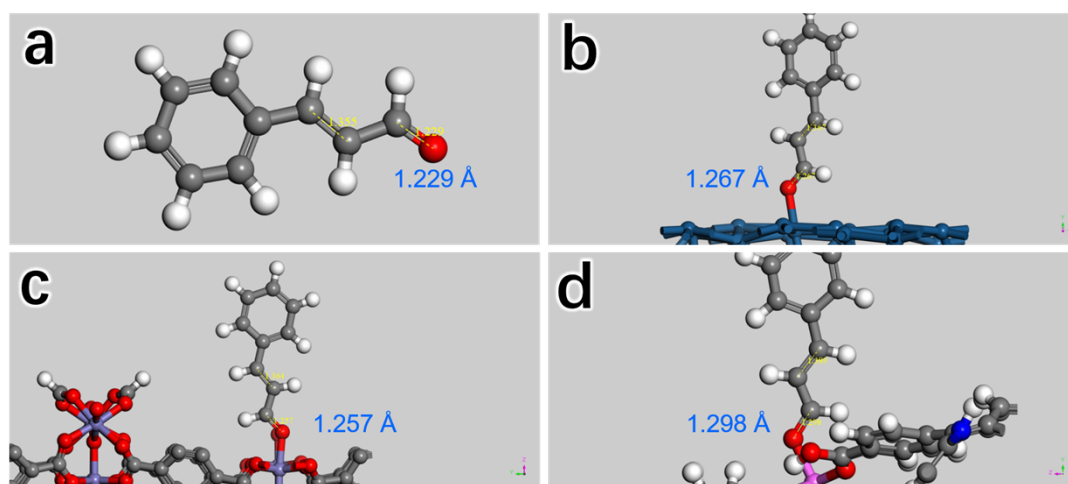

**Figure S17.** The bond length of the C=O double bond of (a) the free CAL molecule. The bond length of the C=O double bond of the CAL molecule adsorbed on (b) Pt NPs, (c) MIL-88B(Fe), and (d) Al-TCPP.

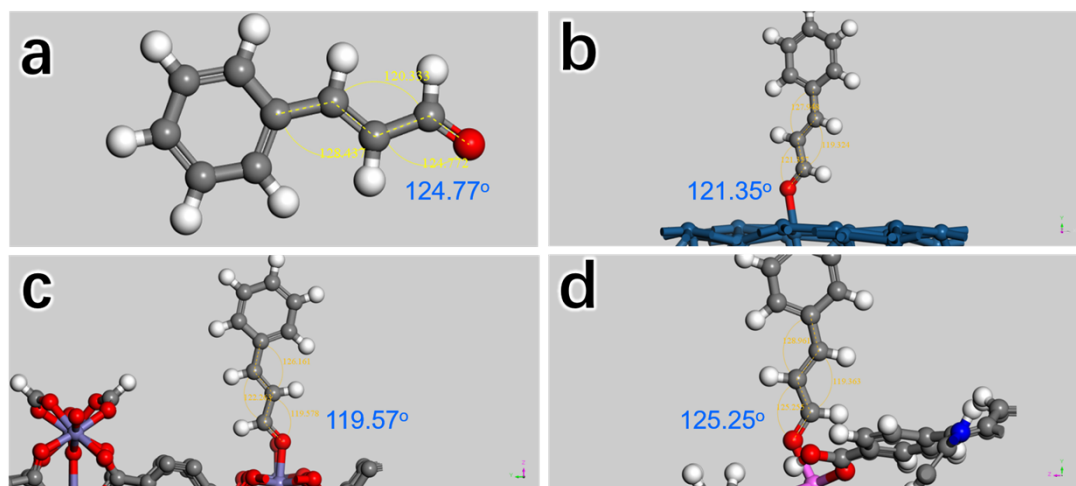

**Figure S18.** The bond angle of the C=O double bond of (a) the free CAL molecule. The bond angle of the C=O double bond of the CAL molecule adsorbed on (b) Pt NPs, (c) MIL-88B(Fe), and (d) Al-TCPP.

## References

1. Y. C. Hong, K. Q. Sun, G. R. Zhang, R. Y. Zhong and B. Q. Xu, *Chem. Commun.*, 2011, **47**, 1300-1302.
2. K.-Q. Sun, Y.-C. Hong, G.-R. Zhang and B.-Q. Xu, *ACS Catal.*, 2011, **1**, 1336-1346.
3. H. Pan, J. Li, J. Lu, G. Wang, W. Xie, P. Wu and X. Li, *J Catal.*, 2017, **354**, 24-36.
4. Q. Wu, C. Zhang, M. Arai, B. Zhang, R. Shi, P. Wu, Z. Wang, Q. Liu, K. Liu, W. Lin, H. Cheng and F. Zhao, *ACS Catal.*, 2019, **9**, 6425-6434.
5. Y. Li, P.-F. Zhu and R.-X. Zhou, *Appl. Surf. Sci.*, 2008, **254**, 2609-2614.
6. X. Xiang, W. He, L. Xie and F. Li, *Catal. Sci. Technol.*, 2013, **3**, 2819-2827.
7. Z. Guo, C. Xiao, R. V. Maligal-Ganesh, L. Zhou, T. W. Goh, X. Li, D. Tesfagaber, A. Thiel and W. Huang, *ACS Catal.*, 2014, **4**, 1340-1348.
8. K. Yuan, T. Song, D. Wang, X. Zhang, X. Gao, Y. Zou, H. Dong, Z. Tang and W. Hu, *Angew. Chemie - Int. Ed.*, 2018, **57**, 5708-5713.
9. M. Zhao, K. Yuan, Y. Wang, G. Li, J. Guo, L. Gu, W. Hu, H. Zhao and Z. Tang, *Nature*, 2016, **539**, 76-80.
10. Y. Zhang, S. Wei, Y. Lin, G. Fan and F. Li, *ACS Omega*, 2018, **3**, 12778-12787.
11. Y. Zhang, C. Chen, W. Gong, J. Song, Y. Su, H. Zhang, G. Wang and H. Zhao, *RSC Adv.*, 2017, **7**, 21107-21113.
12. Y.-S. Shi, Z.-F. Yuan, Q. Wei, K.-Q. Sun and B.-Q. Xu, *Catal. Sci. Technol.*, 2016, **6**, 7033-7037.
13. K. B. Vu, K. V. Bukhryakov, D. H. Anjum and V. O. Rodionov, *ACS Catal.*, 2015, **5**, 2529-2533.
14. Y. Shu, T. Chen, H. C. Chan, L. Xie and Q. Gao, *Chem Asian J*, 2018, **13**, 3737-3744.
